# Supplementary material for: South African University Staff and Students’ Perspectives, Preferences, and Drivers of Hesitancy Regarding COVID-19 Vaccines: A Multi-Methods Study
Source: MDPI journal article supplement (doi:10.3390/vaccines10081250), 2022-08-04
Supplement: s1 [file s1]

Which of the following models of COVID-19 vaccination do you most prefer?

## Option A

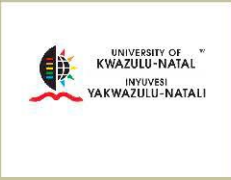

**Vaccination Location:**  
UKZN Campus

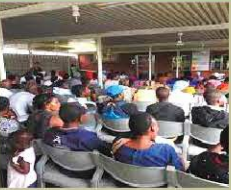

**3 hours**  
waiting time at the  
vaccination site

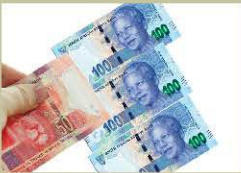

**You get a R 350**  
incentive for  
vaccinating

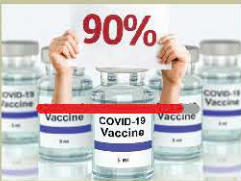

**Vaccine is 90%**  
(very) effective  
against severe  
illness and death

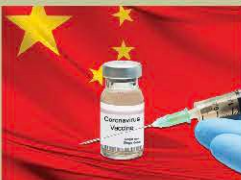

**The vaccine**  
comes from  
China

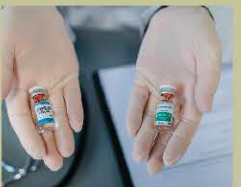

**Two doses**

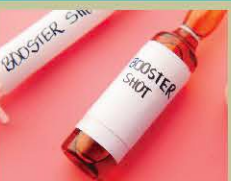

**Booster vaccination**  
required every  
5 years

## Option B

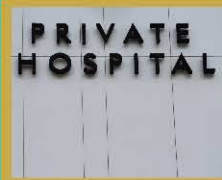

**Vaccination Location:**  
Private Health Facility

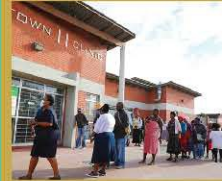

**5 hours**  
waiting time at the  
vaccination site

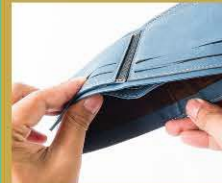

**You get no**  
incentive for  
vaccinating

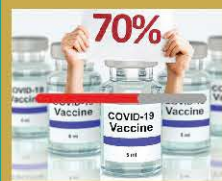

**Vaccine is 70%**  
(moderately) effective  
against severe illness  
and death

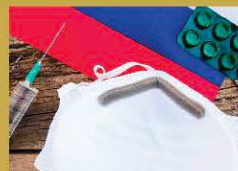

**The vaccine**  
comes from  
Russia

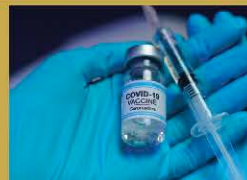

**One dose**

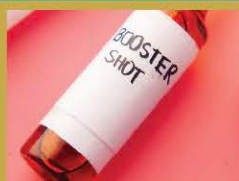

**Annual booster**  
vaccinations  
required
